1 Essential gene analysis in *Acinetobacter baumannii* by high-density transposon mutagenesis and  
2 CRISPR interference

3

4

5 Running Title: *Acinetobacter baumannii* essential gene analysis

6

7 Jinna Bai,<sup>a</sup> Yunfei Dai,<sup>a</sup> Andrew Farinha,<sup>a</sup> Amy Y. Tang,<sup>a</sup> Sapna Syal,<sup>b</sup> German Vargas-Cuebas,<sup>b</sup>

8 Defne Surujon,<sup>c</sup> Ralph R. Isberg,<sup>b</sup> Tim van Opijnen,<sup>c</sup> Edward Geisinger<sup>a#</sup>

9

10 <sup>a</sup>Department of Biology, Northeastern University, Boston, Massachusetts, USA

11 <sup>b</sup>Department of Molecular Biology and Microbiology, Tufts University School of Medicine,  
12 Boston, Massachusetts, USA

13 <sup>c</sup>Department of Biology, Boston College, Chestnut Hill, Massachusetts, USA

14

15

16 #To whom correspondence should be addressed (e.geisinger@northeastern.edu)

17

18

19

20 **Abstract**

21 *Acinetobacter baumannii* is a poorly understood bacterium capable of life-threatening infections  
22 in hospitals. Few antibiotics remain effective against this highly resistant pathogen. Developing  
23 rationally-designed antimicrobials that can target *A. baumannii* requires improved knowledge of  
24 the proteins that carry out essential processes allowing growth of the organism. Unfortunately,  
25 studying essential genes has been challenging using traditional techniques, which usually require  
26 time-consuming recombination-based genetic manipulations. Here, we performed saturating  
27 mutagenesis with dual transposon systems to identify essential genes in *A. baumannii* and we  
28 developed a CRISPR-interference (CRISPRi) system for facile analysis of these genes. We show  
29 that the CRISPRi system enables efficient transcriptional silencing in *A. baumannii*. Using these  
30 tools, we confirmed the essentiality of the novel cell division protein AdvA and discovered a  
31 previously uncharacterized AraC-family transcription factor (ACX60\_RS03245) that is  
32 necessary for growth. In addition, we show that capsule biosynthesis is a conditionally essential  
33 process, with mutations in late-acting steps causing toxicity in strain ATCC 17978 that can be  
34 bypassed by blocking early-acting steps or activating the BfmRS stress response. These results  
35 open new avenues for analysis of essential pathways in *A. baumannii*.

36

37 **Importance**

38 New approaches are urgently needed to control *A. baumannii*, one of the most drug resistant  
39 pathogens known. To facilitate the development of novel targets that allow inhibition of the  
40 pathogen, we performed a large-scale identification of genes whose products the bacterium needs  
41 for growth. We also developed a CRISPR-based gene knockdown tool that operates efficiently in  
42 *A. baumannii*, allowing rapid analysis of these essential genes. We used these methods to define

43 multiple processes vital to the bacterium, including a previously uncharacterized gene-regulatory  
44 factor and export of a protective polymeric capsule. These tools will enhance our ability to  
45 investigate processes critical for the essential biology of this challenging hospital-acquired  
46 pathogen.

47

## 48 **Introduction**

49 The Gram-negative bacterium *Acinetobacter baumannii* is among the most difficult to  
50 treat pathogens causing diseases in hospitals. *A. baumannii* is an important cause of pneumonia  
51 and bloodstream infections and is associated with outbreaks in healthcare environments. The  
52 microorganism has rapidly evolved resistance to a wide variety of antimicrobials, leaving few  
53 therapeutic options for infected patients. Some strains show resistance to all available antibiotics,  
54 including carbapenems and the last-line polymyxins, rendering them exceedingly difficult, if not  
55 impossible, to treat (1, 2). There is an urgent need for new antimicrobials that can target the  
56 pathogen.

57 Devising novel strategies to target and attack *A. baumannii* requires that we understand  
58 proteins that have essential cell functions. Unfortunately, much remains unknown about  
59 fundamental processes in *Acinetobacter*. The genus has diverged from other  
60 *Gammaproteobacteria* and lacks sequence orthologs of several important proteins involved in  
61 key pathways including cell wall synthesis, cell division, stress responses, and transcriptional  
62 regulation (3, 4). Orphan or hypothetical proteins may have evolved to mediate these processes  
63 in unique ways in *Acinetobacter*. A number of such proteins were recently identified through  
64 functional genomics examination of transposon mutant drug susceptibility phenotypes (5). While  
65 this work established functional connections between important biological pathways and

66 uncharacterized proteins, it was designed for analysis of mostly non-essential genes. Phenotypes  
67 linked to essential genes, those required by the organism for growth in standard nutrient medium,  
68 have yet to be systematically examined in *A. baumannii*, although they will likely provide much-  
69 needed insights into pathways enabling growth, stress resistance, and persistence.

70         Although a number of tools allow genetic analysis in *A. baumannii* (6, 7), studying  
71 essential genes is usually an inefficient process. Such genes are typically analyzed by using  
72 homologous recombination to introduce an inducible promoter that substitutes for native control  
73 elements, allowing conditional expression. Engineering mutants in this fashion, however, is  
74 time-consuming and not amenable to scaling for high-throughput analysis. An alternative  
75 approach uses the highly transformable, nonpathogenic relative *A. baylyi* to examine terminal  
76 phenotypes after direct allelic exchange of essential gene deletions (8, 9). The approach enables a  
77 direct view into the consequences of complete gene loss, but such deletions do not allow  
78 tunability of gene expression and analogies with *A. baumannii* must be verified.

79         CRISPR interference (CRISPRi) is a recently described method for easily programmable  
80 gene knockdown in a variety of organisms (10). The most widely used CRISPRi systems employ  
81 a nuclease-deficient variant of the *Streptococcus pyogenes* Cas9 enzyme (dCas9) that is guided  
82 to a target gene by a single guide RNA (sgRNA), a hybrid molecule which incorporates Cas9  
83 scaffolding and DNA targeting sequences (11). Recognition of target DNA depends on both the  
84 sgRNA and a protospacer adjacent motif (PAM) within the targeted DNA bordering the  
85 sequence being targeted. The bound dCas9-sgRNA complex represses expression of the target  
86 gene by sterically hindering transcriptional initiation or elongation (11). A mobilizable CRISPRi  
87 system has been developed for use with several pathogens including *A. baumannii* (12), but the

88 reported knockdown efficiency (~10-fold) is likely to be insufficient for analysis of highly  
89 expressed genes in the organism.

90 In this paper, we present a comprehensive set of candidate essential genes in *A.*  
91 *baumannii* identified through high-density transposon mutagenesis, and the development of a  
92 CRISPRi system for efficient analysis of these genes. We used these tools to confirm the  
93 essentiality of a recently identified orphan protein functioning in cell division, AdvA, as well as  
94 a previously uncharacterized protein belonging to the AraC family of transcriptional activators.  
95 In addition, we demonstrate the conditional essentiality of late steps in the biosynthesis of  
96 capsular polysaccharides. This work identifies new sites of vulnerability in *A. baumannii* and  
97 lays the foundation for future large-scale studies of essential gene function in the pathogen.

98

## 99 **Results**

100 **Identification of candidate essential genes in *Acinetobacter baumannii* by Tn-seq.** To  
101 determine gene essentiality across the *A. baumannii* genome, we performed saturating random  
102 transposon mutagenesis in strain ATCC 17978 and identified mutations that allow colonies to  
103 form on rich medium. To this end, we used two independent transposition systems which enable  
104 random insertional mutagenesis at high efficiency at different sites in the genome: a *HimarI*  
105 *mariner* transposon system (5), which generates insertions at TA dinucleotides (13, 14), and a  
106 Tn10-altered target specificity (Tn10-ATS) system, which generates insertions effectively at  
107 random due to relaxed site specificity (13, 15). We generated two separate, highly saturated  
108 mutant libraries from ~550,000 and ~300,000 mutant colonies with each system, respectively  
109 (Materials and Methods). We next used massively parallel sequencing of transposon-genome  
110 junctions (Tn-seq) to identify the location of transposon insertions within the libraries. Genomic

111 DNA immediately adjacent to transposon insertions was amplified, enumerated by the Illumina  
112 platform, and mapped within the chromosome. With the *mariner* library, insertions were mapped  
113 to 174,238 unique TA sites out of a total of 269,711 possible sites (Materials and Methods),  
114 equivalent to 64.6% of sites hit. With the Tn10-ATS library, insertions were mapped to 98,462  
115 unique chromosomal positions. 368,173 mutants with distinct chromosomal transposon  
116 insertions were represented across both libraries, equivalent to an average of one insertion  
117 approximately every 10 bp.

118 To identify essential genes, these Tn-seq datasets were analyzed independently using  
119 Bayesian/Gumbel methods with the TRANSIT software package (16). These methods identify  
120 genes with unusually long, consecutive stretches of potential insertion sites lacking insertions.  
121 The probability of long gaps occurring by chance is then calculated by a Bayesian (with *mariner*)  
122 or non-Bayesian (with Tn10-ATS) analysis of the Gumbel distribution (16, 17). With the  
123 *mariner* library, 392 genes passed the posterior probability threshold for essentiality, and 79  
124 genes were called “uncertain” due to having a probability of essentiality not exceeding this  
125 threshold (Table S1). With Tn10-ATS, 474 genes were called essential. Genes predicted to have  
126 high probability of essentiality with both transposition systems represent the most reliable  
127 candidates for being essential in the organism, so we analyzed the overlap between hits with both  
128 systems, including the essential and uncertain calls with *mariner* and the essential calls with  
129 Tn10-ATS. This identified 372 genes as hits with both systems (Fig. 1), and we define these 372  
130 genes as the candidate essential gene set in *A. baumannii*. This set of genes corresponded well  
131 with candidate essential genes identified in previous Tn-seq studies with the same strain (18) and  
132 with the unrelated, MDR strain AB5075 (19), with 72% (267 genes) showing essentiality across  
133 all three studies (Fig. S1).

134  
135 **CRISPR interference system for gene knockdown in *A. baumannii*.** To facilitate the analysis  
136 of the candidate essential genes, we developed a CRISPRi system in *A. baumannii*. The system  
137 comprises an anhydrotetracycline (aTc)-inducible *dcas9* inserted at single copy in the  
138 chromosomal *attTn7* site downstream of the *glmS* locus (20), and a constitutive sgRNA module  
139 via a high-copy plasmid derived from pWH1266 (21) (Fig. 2A). In an initial test of gene  
140 knockdown with the CRISPRi system, we targeted the constitutive  $\beta$ -lactamase ADC, levels of  
141 which can be determined by measuring rate of hydrolysis of its specific chromogenic substrate  
142 nitrocefin (22). Using an sgRNA construct containing 24 nucleotides targeting the non-template  
143 (NT) strand of *adc* starting 90 bp downstream of its predicted transcription start site (TSS) (Fig.  
144 2B and Table S2) (23), we observed reduction of  $\beta$ -lactamase levels by almost 2-fold in the  
145 absence of *dcas9* induction compared to a non-targeting control plasmid (Fig. 2C). After *dcas9*  
146 was induced by 100 ng/ml aTc for 2 hours,  $\beta$ -lactamase synthesis decreased by approximately  
147 30-fold compared to control, approaching the background level seen with deletion of the *adc*  
148 gene (Fig. 2C). As expected, *adc* knockdown by CRISPRi increased the susceptibility of *A.*  
149 *baumannii* to ampicillin, a substrate of the ADC enzyme (22, 24). *dcas9* induction completely  
150 blocked growth of the strain harboring the *adc*-targeting sgRNA in the presence of a dose of the  
151 drug that was sub-inhibitory with control cells, with partial growth inhibition observed in the  
152 absence of induction (Fig. 2D). These results show that efficient gene knockdown can be  
153 achieved in *A. baumannii*, enabling investigation of gene-phenotype relationships.

154 We next used CRISPRi to examine essential genes. We first focused on key division  
155 proteins FtsZ and AdvA. The latter is a newly identified protein that plays an essential function  
156 in cell division in *A. baumannii*, shown by phenotypic analysis to participate in coordinating

157 chromosome segregation with cell division (5). Viable transposon insertions were almost  
158 completely undetectable in *ftsZ*, as predicted for this essential gene, and were detected only  
159 within a narrow, central region of *advA*, in agreement with previous findings with lower-density  
160 mutant banks (Fig. 3A) (5). Insertions within this region, which may represent a nonessential  
161 linker between two essential AdvA domains not tolerating mutation, likely contributed to  
162 conflicting essentiality calls (*mariner* predicted essential; Tn10-ATS predicted non-essential;  
163 Table S2). With CRISPRi constructs targeting *ftsZ* (NT strand, starting 79 bp downstream of  
164 predicted TSS(25), Table S2), uninduced cells grew rapidly as short rods characteristic of WT *A.*  
165 *baumannii*, while *dcas9* induction with aTc (200 ng/ml) blocked growth and resulted in a  
166 filamentous morphology after 3 hours (Fig. 3B, C). This level of *dcas9* induction had no  
167 significant effect on growth or morphology with a non-targeting control sgRNA (Fig. S2). We  
168 have shown previously using a conditional allele that *advA* deficiency inhibits growth (5). To  
169 confirm this phenotype by CRISPRi, we designed an sgRNA construct that targeted the NT  
170 strand of its coding region starting 132 bp downstream of the nearest predicted TSS (Fig. 3A,  
171 Table S2). The targeted region was at least 60bp away from the predicted TSS of the divergently  
172 transcribed neighboring gene, *serB*, outside of the region bound by the initial RNAP complex (-  
173 55 to +20 from a TSS); therefore, this site should not block *serB* transcription (11). As with *ftsZ*,  
174 this *advA*-targeting sgRNA resulted in growth inhibition (Fig. 3D) and striking filamentation  
175 after 3 hours of *dcas9* induction (Fig. 3E). While growth inhibition occurred less rapidly and at a  
176 higher cell density than with *ftsZ*, *advA* knockdown cultures were completely blocked for growth  
177 when back-diluted to lower cell density in fresh induction medium (Fig. 3D). These results  
178 support our previous genetic analysis demonstrating an essential role for AdvA in *A. baumannii*  
179 cell replication (5).



180

181 **ACX60\_RS03245, encoding a predicted transcription factor, is an essential gene.**

182 Transcriptional regulation in *A. baumannii* shows some unusual features, including a small  
183 number of sigma factors (4), a large number of transcriptional regulators that jointly control  
184 virulence and antibiotic resistance (22, 26, 27), and a reliance on the transcriptional regulator  
185 Hfq for growth (28, 29). Given these features and its divergence from other  
186 *Gammaproteobacteria*, we predicted that the pathogen may encode unidentified essential  
187 transcriptional regulators. As shown in Table S3, we identified 11 candidate essential  
188 transcription factors from our Tn-seq datasets. These included the housekeeping sigma factor  
189 (*rpoD*), the heat-shock sigma factor (*rpoH*) (30), and *hfq*, as expected; two loci encoding  
190 proteins with LexA or Cro/CI homology that were internal to prophages (13) (ACX60\_RS07435,  
191 ACX60\_RS10145) and likely suppress lytic phage replication; and several previously  
192 uncharacterized putative transcription factors belonging to the TetR or AraC family (Table S3).  
193 In addition, we identified *ompR*, a non-essential gene in strain AB5075 (31), as a candidate  
194 essential transcription factor in ATCC 17978. Our Tn-seq data are thus able to define candidate  
195 transcription factors which may exert control over essential aspects of *A. baumannii* growth.

196 We focused our analysis on ACX60\_RS03245 (hereafter referred to *RS03245*), a  
197 previously uncharacterized candidate essential gene encoding a predicted AraC-family  
198 transcription factor. *RS03245* is conserved across *A. baumannii* isolates (32) and is also a  
199 candidate essential hit in previous Tn-seq analyses (18, 19). AraC-family regulators typically  
200 control catabolism of sugars and amino acids, stress responses, and production of virulence  
201 factors (33, 34), and it is unusual for a protein of this family to be essential in rich medium. The  
202 domain architecture of the *RS03245*-encoded protein is similar to that of other members of the

203 AraC regulator family (Fig. S3A). In addition, structural homology modeling (35) predicted a  
204 relationship with CdpR, a nonessential AraC-family regulator that controls quorum sensing and  
205 virulence in *Pseudomonas aeruginosa* (36), despite low sequence identity (22%) (Fig. S3B,C).  
206 Transposon insertions were undetectable in the *RS03245* locus (Fig. 4A), consistent with the  
207 encoded protein playing an important role in controlling processes essential for *A. baumannii*  
208 growth.

209 We used CRISPRi to examine the essentiality of *RS03245* predicted by Tn-seq. We  
210 designed two separate constructs, sgRNA-15 and sgRNA-16, that target the 5' end of the  
211 *RS03245* coding region near the predicted TSS (Fig. 4A, Table S2). With sgRNA-15, we  
212 determined knockdown efficiency by measuring *RS03245* transcription via qRT-PCR. In the  
213 absence of *dcas9* induction, *RS03245* transcript levels were decreased 4-fold compared to non-  
214 targeting control, while induction for 2 hours with 50 ng/ml aTc caused transcript levels to  
215 decrease by more than 100-fold (Fig. 4B). CRISPRi knockdown of *RS03245* is therefore highly  
216 efficient. With both sgRNA-15 and sgRNA-16, *dcas9* induction blocked growth on solid (Fig.  
217 4C) and liquid (Fig. 4D) LB medium. Colony formation on LB agar was extremely sensitive to  
218 the dose of inducer and was inhibited by sgRNA-15 at aTc concentrations as low as 1.56 ng/ml  
219 (Fig. S3D). Growth was also blocked in two types of M9 minimal medium containing either  
220 glucose/casamino acids or succinate (Fig. 4E), indicating that *RS03245* essentiality was a general  
221 phenotype not specifically depending on rapid growth in rich medium.

222 We confirmed the above phenotypes by (1) using CRISPRi in two different strain  
223 backgrounds and (2) by analyzing *RS03245* essentiality with a completely different genetic  
224 approach using a conditional allele. First, we moved the *tetP-dcas9* module to the *attTn7* site of  
225 *A. baumannii* strains ATCC 19606 and AB5075 $\Delta$ RI, a derivative of AB5075 lacking two large

226 resistance islands (37). *dcas9* induction in the presence of an *RS03245*-targeting guide (sgRNA-  
227 15) but not the control construct completely blocked colony formation on LB agar medium with  
228 both strain backgrounds (Fig. 4F, G), indicating that *RS03245* has an important function  
229 independent of strain background. This is supported by the finding that *RS03245* was an essential  
230 gene candidate with AB5075 based on Tn-seq (19). Second, we engineered a derivative of  
231 ATCC 17978 in which *RS03245* expression was IPTG-dependent. This was accomplished by  
232 replacing the *RS03245* promoter with a *lacI<sup>q</sup>-T5lacP* control module using homologous  
233 recombination. This mutant (JBA58) depended on IPTG for growth on LB agar (Fig. 4H), in  
234 liquid LB (Fig. 4I), as well as in minimal M9 media (Fig. 4J), with growth increasing with  
235 increasing IPTG concentration (Fig. 4I,J). These phenotypes closely resembled the effects of  
236 CRISPRi knockdown of *RS03245*. Introducing a constitutive copy of *RS03245* (as fusion to  
237 either GFP or 3XFLAG epitope) into JBA58 restored the ability to grow in the absence of IPTG  
238 (Fig. S3E), indicating that the IPTG-dependence growth phenotypes could be attributed solely to  
239 control of *RS03245* expression. Together these results establish *RS03245*, encoding a predicted  
240 AraC-family transcription factor, as a novel essential gene in *A. baumannii*.

241  
242 **Conditional essentiality of late-stage capsule biosynthesis proteins.** The consequences of  
243 blocking synthesis of capsule, a key virulence factor, on the physiology of *A. baumannii* is  
244 incompletely understood (3). Based on bioinformatics analyses and homology with well-studied  
245 systems in other organisms (38, 39), capsule biosynthesis across diverse *A. baumannii* isolates is  
246 by a Wzy-dependent pathway in which activated sugars (Fig. 5A, steps encoded by genes shaded  
247 purple and blue) are utilized by sequential glycosyltransferases (Fig. 5A, encoded by genes  
248 shaded green) to build an oligosaccharide repeat unit on an undecaprenyl phosphate (Und-P)

249 lipid carrier (40). The repeat units are then flipped, polymerized and exported to the surface (3)  
250 (Fig. 5A, steps encoded by genes in orange). In addition to preventing the formation of structural  
251 capsule, defects in this pathway occurring after the initial glycosyltransferase step (Fig. 5A, pink)  
252 may have toxic consequences if they generate stalled intermediates that sequester Und-P, which  
253 is essential to peptidoglycan synthesis (3, 41, 42). In our high-density Tn-seq analysis, 7 out of 9  
254 genes encoding enzymes predicted to act after the ItrA initiating glycosyltransferase were  
255 candidate essential genes (Table S1, *gtr7*, *gtr8*, *wzx*, *wzy*, *wza*, *wzb*, and *wzc*). This analysis is  
256 consistent with the model that lesions in late steps in capsule synthesis acting after a committed  
257 step are lethal due to the generation of dead-end intermediates.

258 We employed CRISPRi to test this model and assess whether block of the early step, by  
259 ItrA, in which Und-P acceptors are likely dedicated to capsule can relieve toxicity. First, we  
260 confirmed that knockdown of the late-stage capsule export module (encoded by the co-  
261 transcribed genes *wza-wzb-wzc*, Fig. 5A) prevents growth. We designed 4 distinct sgRNA  
262 constructs targeting different positions within this operon (Fig. 5A, vertical arrows; Table S2).  
263 While CRISPRi has polar effects and these sgRNAs likely modulate the entire *wza-wzb-wzc*  
264 operon, each gene encodes a part of the same complex dedicated to capsule export and high-level  
265 polymerization (43). Interference of operon transcription by CRISPRi should thus enable  
266 targeted examination of this process. With two of the sgRNAs (1 and 3), we verified via alcian  
267 blue staining of SDS-PAGE-separated cell lysates ((44) and Materials and Methods) that  
268 production of capsular polysaccharides was blocked after *dcas9* induction (Fig. 5B). In the  
269 absence of inducer these sgRNAs had minimal effect on capsule production (Fig. 5B). Consistent  
270 with these results and our Tn-seq analysis, sgRNA-1 through 4 each blocked growth only when  
271 *dcas9* was induced (Fig. 5C, circles). To test the model that late-step capsule synthesis defects

272 can be tolerated when the predicted committed step in Und-P usage is prevented (by blocking  
273 ItrA), we moved the CRISPRi machinery into EGA295 (ATCC 17978  $\Delta itrA$ ) and repeated the  
274 *dcas9* induction experiment. Strikingly, CRISPRi block of *wza-wzb-wzc* had no effect on growth  
275 in the absence of *itrA* (Fig. 5C, squares), despite knockdown being highly efficient under these  
276 conditions as determined by measuring *wza* transcription levels (Fig. 5D). The ability of  $\Delta itrA$  to  
277 suppress the nonviability caused by late-stage capsule block was confirmed by isolating a  $\Delta itrA$   
278  $\Delta wzc$  double mutant strain. Unlike the  $\Delta wzc$  single mutant which could not be successfully  
279 isolated from an ItrA<sup>+</sup> background in the absence of compensatory mutations (44),  $\Delta wzc$  was  
280 easily isolated in a  $\Delta itrA$  background, and the resulting double mutant had WT growth kinetics  
281 (Fig. 5E). Together these results indicate that the essentiality of late steps in capsule assembly  
282 can be bypassed when flux into the pathway is prevented.

283 We used CRISPRi to confirm an additional pathway allowing bypass of lethality  
284 associated with capsule production defects. Our previous work identified *bfmS* as a site of  
285 suppressor mutations that allowed growth of a  $\Delta wzc$  strain (44). BfmS is part of the BfmRS two-  
286 component system, and null mutations in *bfmS* cause augmented expression of envelope stress  
287 response genes and genes determining synthesis of envelope structures including capsule and  
288 Und-P (22). These changes may enhance how cells cope with deleterious dead-end intermediates  
289 associated with capsule production defects. We used CRISPRi to confirm the suppressive  
290 interaction between *bfmS* and late-stage capsule block. After moving the CRISPRi system to a  
291 BfmS<sup>-</sup> strain background, (*bfmS*<sup>1-467</sup>, Table S2, (22, 44)), guides 1-4 were tested for ability to  
292 inhibit growth in the absence and presence of *dcas9* induction. As predicted and in contrast to  
293 WT (BfmS<sup>+</sup>) bacteria, *bfmS*<sup>1-467</sup> cells tolerated CRISPRi targeting of *wza-wzb-wzc* despite *dcas9*  
294 induction, although partial growth inhibition was observed compared to the control sgRNA (Fig.

295 5C, triangles). These results are consistent with envelope stress response activation providing a  
296 second pathway to allow toleration of late stage capsule synthesis defects.

297

## 298 **Discussion**

299 In this study, we have defined a candidate essential gene set in *A. baumannii* and we have  
300 established a CRISPRi tool for analysis of these genes. Our essential gene search was  
301 comprehensive and utilized two different global transposition systems based on unrelated classes  
302 of transposase enzymes. This approach provided a high level of saturation of the genome and  
303 allowed us to build a consensus set of candidate essential genes. This candidate essential gene set  
304 can guide the selection of targets in future studies aimed at dissecting the *A. baumannii* essential  
305 genome.

306 To target essential genes, we developed a CRISPRi knockdown system for *A. baumannii*.  
307 The system was controllable and efficient, with low-level (~2-4 fold) decreases observed in the  
308 absence of *dcas9* induction by aTc, and effective shut-down of gene expression (by ~30- to 100-  
309 fold with different genes) with induction. Knockdown is likely to be titratable using dilutions of  
310 aTc, as indicated by the relationship of aTc concentration with colony formation by cells  
311 containing *RS03245*-targeting sgRNA (Fig. S3D). CRISPRi knockdown was as effective as  
312 classical allelic replacement techniques in allowing analysis of conditional growth phenotypes  
313 and was functional in multiple strain backgrounds (Fig. 4). The efficiency of our system is an  
314 advancement over a previous system which showed ~10-fold knockdown with *A. baumannii*  
315 (12). By using pools of diverse guides, this system should facilitate large-scale examination of  
316 terminal and hypomorphic phenotypes linked to essential genes (11, 45). Such studies have the  
317 potential to illuminate essential protein function and inform novel antimicrobial target

318 development, and would complement previous functional genomics studies that focused largely  
319 on nonessential genes in *A. baumannii*(5).

320         The candidate essential gene set and knockdown system developed in this study  
321 facilitated the confirmation that *advA* is an essential gene in *A. baumannii*, identification of  
322 essential predicted transcription factors including *RS03245*, and demonstration of the conditional  
323 essentiality of capsule export proteins. Part of the core genome (32), *RS03245* is one of 33 genes  
324 encoding AraC-family transcription factors in *A. baumannii* but was the only one determined to  
325 be essential in this and previous Tn-seq studies (Table S4). By analogy with most AraC-family  
326 proteins which are transcriptional activators (33), *RS03245* may enhance transcription of genes  
327 contributing to one or more essential pathways. Studies are underway to characterize the  
328 *RS03245* regulon and its relationship to essential genetic networks in the organism. In addition,  
329 we demonstrated that late steps in capsule biosynthesis are essential in ATCC 17978 unless  
330 suppressed by one of at least two pathways controlled by *itrA* or *bfmS*. This conditional  
331 essentiality mirrors that seen with defects in Wzy-dependent synthesis of capsule in *S.*  
332 *pneumoniae* (46, 47) and *E. coli* (48), and of O-antigen in *E. coli* (49). It also parallels the  
333 conditional toxicity of LOS synthesis lesions in *A. baumannii*, in which defects in late-acting  
334 synthesis steps are lethal unless flux into the pathway is reduced (50-52). The molecular basis for  
335 toxicity and for the differential ability of *A. baumannii* strains to cope with capsule synthesis  
336 defects (3) is unclear. Understanding these processes in future studies may inform strategies to  
337 attack the pathogen's protective envelope.

338         In summary, we have identified candidate essential genes in *A. baumannii* and developed  
339 a CRISPRi-based tool that facilitated rapid validation of the essentiality of a number of these  
340 candidates. This tool should enhance both targeted and large-scale analyses of essential

341 processes in the microorganism. In addition, the essential pathways determined in this work open  
342 new avenues for research into the pathogen's dependence on transcriptional control and envelope  
343 homeostasis for growth and survival.

344

345

## 346 **Materials and Methods**

347 **Bacterial strains, growth conditions, and antibiotics.** Bacterial strains used in this work are  
348 described in Table S5. *A. baumannii* strains were derivatives of ATCC 17978 unless otherwise  
349 noted. Bacteria were cultured in Lysogeny Broth (LB) (10 g/L tryptone, 5 g/L yeast extract,  
350 10 g/L NaCl) unless otherwise noted. Cultures were incubated at 37°C in flasks with shaking or  
351 in tubes on a roller drum. Growth was monitored by measuring absorbance at 600nm via a  
352 spectrophotometer. Where indicated, microtiter format growth was with 96-well plates incubated  
353 with shaking in a plate reader (Epoch 2 or Synergy H2M, Biotek). LB agar was supplemented  
354 with antibiotics [carbenicillin (Cb) at 50-100 µg/ml with all strains except *A. baumannii*  
355 AB5075ΔRI, 1600µg/ml), kanamycin (Km) at 10-20 µg/ml, gentamicin (Gm) at 10 or 40µg/ml]  
356 or sucrose as needed (Sigma Aldrich).

357

358 **Construction of transposon mutant libraries.** Mutagenesis with the *mariner* and Tn10-ATS  
359 transposon systems was performed by electroporation with pDL1100 and pDL1073, respectively  
360 (5, 13). Transformed cells were spread on membrane filters, allowed to recover on solid SOC,  
361 and enriched after transfer to selective solid LB-Km medium as described (5, 13). Colonies were  
362 lifted from filters by agitation in sterile PBS, mixed with sterile glycerol (10%), aliquoted, and  
363 stored at -80°C. With *mariner*, colonies from 10 previously constructed *mariner* subpools (5) as



364 well as 28 additional subpools constructed for this study were analyzed in aggregate,  
365 representing a total of approximately 550,000 mutant colonies. With Tn10-ATS, colonies from  
366 11 previously constructed subpools (13), as well as 12 additional subpools constructed for this  
367 study were analyzed in aggregate, representing approximately 300,000 mutant colonies in total.

368

369 **Tn-seq Illumina library preparation and sequencing.** Genomic DNA was extracted from  
370 samples (Qiagen DNeasy Kit) and quantified by a SYBR green microtiter assay. Transposon-  
371 adjacent DNA was tagmented and amplified for Illumina sequencing using a modified Nextera™  
372 DNA Library Prep method as described (13). Samples were multiplexed, reconditioned, and size  
373 selected (250- or 275-600bp, Pippin HT) before sequencing (single-end 50bp) using custom  
374 primers (5, 13) on a HiSeq2500 with High Output V4 chemistry at Tufts University Genomics  
375 Core Facility.

376

377 **Tn-seq data analysis.** Sequencing reads were quality-filtered and clipped of adapters with  
378 BBduk, collapsed with fastx\_collapser, and mapped to the *A. baumannii* chromosome  
379 (NZ\_CP012004) with Bowtie (5). To process the *mariner* dataset into an input file for TRANSIT  
380 analysis, the coordinates of TA sites in the NZ\_CP012004 genome that can be uniquely mapped  
381 to (i.e., not part of repeat regions) were identified, and mapped reads were tabulated according to  
382 these sites in wig format using custom python scripts. With the Tn10-ATS data set, mapped  
383 reads were tabulated in a wig file containing all chromosome coordinates using python. Read  
384 counts were normalized across all subpools within a dataset (*mariner* or Tn10-ATS) by the TTR  
385 method with the TRANSIT software package (16) and merged into a single wig file for each  
386 dataset, and scaled such that median read coverage at non-zero insertion sites was similar

387 between datasets. To determine gene essentiality with TRANSIT, the *mariner* dataset was  
388 analyzed by the Gumbel method (parameters: ignore C-terminal 10%, Sample Size 10000, Burn-  
389 in 500, Trim 1, minimum read 5), and Tn10-ATS was analyzed by Tn5gaps method (parameters:  
390 ignore C-terminal 10%, minimum read 5) (16). Orthologs in CP000521 (ATCC 17978 genome  
391 file used in (18)) and CP008706 (AB5075-UW genome used in (19)) were matched to  
392 NZ\_CP012004 genes by using Mauve to identify positional orthologs (53) and by Boundary-  
393 Forest Clustering (54). Relationship of essential genes were analyzed via Venn diagrams using  
394 BioVenn (55). Integrative Genomics Viewer (56) was used to visualize normalized Tn-seq read  
395 counts and unique TA insertion sites along chromosome coordinate.

396

397 **Molecular cloning and mutant construction.** Oligonucleotide primers and plasmids used in  
398 this study are listed in Table S6. All constructs containing cloned PCR products were verified by  
399 sequencing (Genewiz). A miniTn7 element containing *dcas9* was constructed by PCR-  
400 amplifying the *tetR-tetP-dcas9-rrnBT1-T7Te* fragment from pdCas9-bacteria (Addgene #44249,  
401 gift of Stanley Qi) with primers containing SpeI and PstI sites, cloning in the HincII site of  
402 pUC18, and subcloning in the SpeI and PstI sites of pUC18T-miniTn7T-Gm (57) to generate  
403 pYDE009 (Cb<sup>r</sup>, Gm<sup>r</sup>). The miniTn7 element of pYDE009 was moved into *A. baumannii* by  
404 four-parental mating (44, 58) using Vogel Bonner Medium with Gm at 10 µg/ml (ATCC 17978,  
405 AB5075ΔRI) or 40µg/ml (ATCC 19606), creating YDA004 and JBA106, respectively.  
406 Integration at the *attTn7* locus was confirmed by PCR (20, 59). A plasmid for sgRNA expression  
407 in *A. baumannii* was constructed by replacing the BamHI-SalI fragment internal to *tetA* in shuttle  
408 vector pWH1266(21) with a PCR product having the same restriction sites and J23119, sgRNA,  
409 and terminator from pgRNA-bacteria (Addgene #44251, gift of Stanley Qi), generating

410 pYDE007 (C<sub>b</sub><sup>r</sup>). To construct a Km<sup>r</sup> derivative of pYDE007, the EcoRI-PstI fragment containing  
411 *bla* was replaced with a PCR product containing the kanamycin resistance gene from pDL1100  
412 and the same restriction sites, generating pJE53 (Km<sup>r</sup>). pYDE0007 and pJE53 contain the non-  
413 targeting guide sequence, AACTTTCAGTTTAGCGGTCT, derived from the mRFP guide in  
414 pgRNA-bacteria. These plasmids served as non-targeting controls in CRISPRi experiments.

415 Plasmids encoding sgRNAs for targeted CRISPRi were constructed by PCR-amplifying  
416 the gRNA scaffold region of pYDE007, using a forward primer containing a 24-base targeting  
417 sequence and SpeI site at its 5' end, a reverse primer with ApaI in its 5' end, and OneTaq PCR  
418 Master Mix (NEB). Reverse primers for most sgRNAs also contained a unique KpnI or BglII site  
419 to assist clone identification by restriction fragment analysis. PCR products were digested with  
420 SpeI and ApaI and cloned by replacing the SpeI-ApaI guide fragment in pYDE007. sgRNA  
421 plasmids were introduced into YDA004 and JBA106 via electroporation. sgRNA targeting  
422 sequences were the 23 or 24 bases 5' to PAM sites selected based on (i) proximity to the TSS  
423 preceding each target gene, (ii) targeting the non-template strand, and (iii) having a 12-nt seed  
424 region found only once in the genome (11, 60).

425 A strain containing a conditional allele of *RS03245* was constructed as follows. *RS03245*  
426 was first cloned as a translational fusion to GFP in pJC180 using BamHI and XbaI sites, and the  
427 fusion gene was subcloned in pYDE152 using SmaI and PstI sites, generating *lacI<sup>q</sup>-T5lacP-*  
428 *RS03245-gfp* (pJE10). As 3' homology arm, the *lacI<sup>q</sup>-T5lacP- RS03245* sequence was PCR  
429 amplified with primers containing SphI and NotI sites and cloned in pUC18, generating pJE41.  
430 As 5' homology arm, approximately 1kb of sequence upstream of *RS03245* was PCR-amplified  
431 with primers having SphI and SalI sites and cloned in pUC18, generating pJE40. Clones were  
432 joined and subcloned in pJB4648 by 3-way ligation, generating pJE44. pJE44 was delivered into

433 *A. baumannii* ATCC 17978 by electroporation, and counterselection allelic exchange (44) was  
434 used to isolate JBA58, in which the native *RS03245* promoter is replaced with *lacI<sup>q</sup>-T5lacP*.

435 To construct complementing plasmids, *RS03245*-GFP or *RS03245* translationally fused to  
436 a 3X-FLAG epitope were subcloned between the BamHI and SphI sites internal to *tetA* in  
437 pWH1266, generating pJE51 and pJE50, respectively. In each, *RS03245* is expressed by a  
438 constitutive *tet* promoter.

439 A  $\Delta$ *itrA*  $\Delta$ *wzc* mutant was constructed by introducing pEGE76 (allelic exchange vector  
440 with  $\Delta$ *wzc*::Gm<sup>r</sup> (44)) into EGA295 (*itrA* single mutant) by electroporation, and using  
441 counterselection allelic exchange to isolate JBA48( $\Delta$ *itrA*  $\Delta$ *wzc*, Gm<sup>r</sup>).

442

443  **$\beta$ -lactamase assays.** Overnight bacterial cultures were back-diluted to A<sub>600</sub> 0.025, grown to A<sub>600</sub>  
444 0.05, and cultures were divided with one group receiving aTc (100 ng/ml). After 2 additional  
445 hours of growth, cells were harvested by centrifugation, washed, and resuspended in ice-cold 0.1  
446 M phosphate buffer (pH 7). Periplasmic contents were liberated by ultrasonication using a  
447 Branson high-intensity cuphorn sonifier chilled to 4°C (4 cycles of 1 min ON at 50% output/1  
448 min OFF). Extracts were clarified by centrifugation, diluted with 0.1M phosphate buffer (pH 7),  
449 and protein concentration was determined via Bradford assay (Pierce).  $\beta$ -lactamase content was  
450 measured in 250  $\mu$ l reaction mixtures containing 10  $\mu$ g total protein and 20 $\mu$ g/ml nitrocefin in  
451 0.1M phosphate buffer, pH 7 by reading absorbance at 486 nm every minute for 15 minutes at  
452 room temperature in microtiter plates (Biotek Synergy H1M).  $\beta$ -lactamase activity was  
453 calculated as initial reaction rate ( $V_{\max}$ )  $\times$  dilution factor.

454

455 **Microscopy.** Bacteria were immobilized on agarose pads (1% in PBS), and imaged via 100x/1.3  
456 phase-contrast objective on a Leica AF6000 microscope.

457

458 **Analysis of capsular polysaccharide.** Overnight bacterial cultures were diluted to OD 0.025,  
459 grown to OD 0.05, and divided into groups receiving 0 or 200ng/ml aTc. Cultures were grown  
460 for 4 additional hours. Polysaccharides were isolated from whole-cell lysates with slight  
461 variations from previously described methods (44, 61). Cells were pelleted, frozen at -80°C, and  
462 resuspended with 60mM Tris, pH 8 buffer containing 10mM MgCl<sub>2</sub> and 50μM CaCl<sub>2</sub>. 0.5 μl  
463 lysonase (Novagen) was added per 100 μl suspension, and samples were incubated at 37°C for  
464 30 minutes followed by vortexing. SDS was added to 0.5%, and samples were incubated at 37°C  
465 for 15 minutes. 2 μl Proteinase K (NEB) was added and samples were incubated at 56°C for 1  
466 hour. SDS sample buffer was added to 1X concentration and samples were boiled for 5 minutes.  
467 Samples were separated on 4-20% BioRad TGX Tris-glycine gels and stained overnight with  
468 alcian blue. Gels were imaged via white light transillumination with a ChemiDoc MP (BioRad).

469

#### 470 **qPCR gene expression analysis**

471 Overnight bacterial cultures were diluted to OD 0.025, grown to OD 0.05, and divided into aTc-  
472 treated or untreated groups. After 2 (sgRNA<sub>RS03245-15</sub>) or 4 hours (sgRNA-1) additional growth,  
473 samples were combined with one volume of ice-cold ethanol-acetone and frozen at -80°C.  
474 Samples were thawed and washed with TE, followed by RNA extraction (RNeasy kit, Qiagen)  
475 and DNase treatment (DNA-free kit, Ambion). RNA was reverse transcribed using Superscript II  
476 Reverse Transcriptase (Invitrogen). cDNA was diluted and used as template with the Power-Up  
477 SYBR Green Master Mix (Applied Biosystems) in a StepOnePlus system according to the

478 manufacturer's instructions for two-step RT-PCR. Primers targeting *RS03245* and *wza* were  
479 designed using PrimerQuest (IDT). Assay efficiency was assessed by generating a standard  
480 curve with a dilution series of cDNA and was determined to be >99% with each target. Controls  
481 lacking reverse-transcriptase were performed to confirm lack of signal from residual genomic  
482 DNA. Gene expression levels were quantified by using the  $2^{-\Delta\Delta Ct}$  method with *rpoC* as  
483 endogenous control (22).

484

#### 485 **Acknowledgements.**

486 This work was supported by Northeastern University College of Science startup funds and  
487 NIAID awards U01AI124302 and R21AI128328. We thank Stanley Qi for plasmid gifts, Colin  
488 Manoil for strain AB5075 $\Delta$ RI, Elizabeth Schwartz for technical assistance, and members of the  
489 Geisinger lab for helpful discussions.

490

#### 491 **References**

492

- 493 1. Nowak J, Zander E, Stefanik D, Higgins PG, Roca I, Vila J, McConnell MJ, Cisneros  
494 JM, Seifert H, MagicBullet Working Group WP. 2017. High incidence of pandrug-  
495 resistant *Acinetobacter baumannii* isolates collected from patients with ventilator-  
496 associated pneumonia in Greece, Italy and Spain as part of the MagicBullet clinical trial.  
497 *J Antimicrob Chemother* 72:3277-3282.
- 498 2. Qureshi ZA, Hittle LE, O'Hara JA, Rivera JI, Syed A, Shields RK, Pasculle AW, Ernst  
499 RK, Doi Y. 2015. Colistin-resistant *Acinetobacter baumannii*: beyond carbapenem  
500 resistance. *Clin Infect Dis* 60:1295-303.
- 501 3. Geisinger E, Huo W, Hernandez-Bird J, Isberg RR. 2019. *Acinetobacter baumannii*:  
502 Envelope Determinants That Control Drug Resistance, Virulence, and Surface  
503 Variability. *Annu Rev Microbiol* 73:481-506.
- 504 4. Robinson A, Brzoska AJ, Turner KM, Withers R, Harry EJ, Lewis PJ, Dixon NE. 2010.  
505 Essential biological processes of an emerging pathogen: DNA replication, transcription,  
506 and cell division in *Acinetobacter* spp. *Microbiol Mol Biol Rev* 74:273-97.
- 507 5. Geisinger E, Mortman NJ, Dai Y, Cokol M, Syal S, Farinha A, Fisher DG, Tang AY,  
508 Lazinski DW, Wood S, Anthony J, van Opijnen T, Isberg RR. 2020. Antibiotic  
509 susceptibility signatures identify potential antimicrobial targets in the *Acinetobacter*  
510 *baumannii* cell envelope. *Nature Communications* 11:4522.

- 511 6. Biswas I. 2015. Genetic tools for manipulating *Acinetobacter baumannii* genome: an  
512 overview. *J Med Microbiol* 64:657-669.
- 513 7. Tucker AT, Nowicki EM, Boll JM, Knauf GA, Burdis NC, Trent MS, Davies BW. 2014.  
514 Defining gene-phenotype relationships in *Acinetobacter baumannii* through one-step  
515 chromosomal gene inactivation. *mBio* 5:e01313-14.
- 516 8. Bailey J, Cass J, Gasper J, Ngo ND, Wiggins P, Manoil C. 2019. Essential gene deletions  
517 producing gigantic bacteria. *PLoS Genet* 15:e1008195.
- 518 9. Gallagher LA, Bailey J, Manoil C. 2020. Ranking essential bacterial processes by speed  
519 of mutant death. *Proc Natl Acad Sci U S A* 117:18010-18017.
- 520 10. Tarasava K, Oh EJ, Eckert CA, Gill RT. 2018. CRISPR-Enabled Tools for Engineering  
521 Microbial Genomes and Phenotypes. *Biotechnol J* 13:e1700586.
- 522 11. Qi LS, Larson MH, Gilbert LA, Doudna JA, Weissman JS, Arkin AP, Lim WA. 2013.  
523 Repurposing CRISPR as an RNA-guided platform for sequence-specific control of gene  
524 expression. *Cell* 152:1173-83.
- 525 12. Peters JM, Koo BM, Patino R, Heussler GE, Hearne CC, Qu J, Inclan YF, Hawkins JS,  
526 Lu CHS, Silvis MR, Harden MM, Osadnik H, Peters JE, Engel JN, Dutton RJ, Grossman  
527 AD, Gross CA, Rosenberg OS. 2019. Enabling genetic analysis of diverse bacteria with  
528 Mobile-CRISPRi. *Nat Microbiol* 4:244-250.
- 529 13. Geisinger E, Vargas-Cuebas G, Mortman NJ, Syal S, Dai Y, Wainwright EL, Lazinski D,  
530 Wood S, Zhu Z, Anthony J, van Opijnen T, Isberg RR. 2019. The Landscape of  
531 Phenotypic and Transcriptional Responses to Ciprofloxacin in *Acinetobacter baumannii*:  
532 Acquired Resistance Alleles Modulate Drug-Induced SOS Response and Prophage  
533 Replication. *MBio* 10.
- 534 14. Lampe DJ, Grant TE, Robertson HM. 1998. Factors affecting transposition of the Himar1  
535 mariner transposon in vitro. *Genetics* 149:179-87.
- 536 15. Kleckner N, Bender J, Gottesman S. 1991. Uses of transposons with emphasis on Tn10.  
537 *Methods Enzymol* 204:139-80.
- 538 16. DeJesus MA, Ambadipudi C, Baker R, Sasseti C, Ioerger TR. 2015. TRANSIT--A  
539 Software Tool for Himar1 TnSeq Analysis. *PLoS Comput Biol* 11:e1004401.
- 540 17. Griffin JE, Gawronski JD, DeJesus MA, Ioerger TR, Akerley BJ, Sasseti CM. 2011.  
541 High-resolution phenotypic profiling defines genes essential for mycobacterial growth  
542 and cholesterol catabolism. *PLoS Pathog* 7:e1002251.
- 543 18. Wang N, Ozer EA, Mandel MJ, Hauser AR. 2014. Genome-wide identification of  
544 *Acinetobacter baumannii* genes necessary for persistence in the lung. *MBio* 5:e01163-14.
- 545 19. Gallagher LA, Ramage E, Weiss EJ, Radey M, Hayden HS, Held KG, Huse HK,  
546 Zurawski DV, Brittnacher MJ, Manoil C. 2015. Resources for Genetic and Genomic  
547 Analysis of Emerging Pathogen *Acinetobacter baumannii*. *J Bacteriol* 197:2027-35.
- 548 20. Kumar A, Dalton C, Cortez-Cordova J, Schweizer HP. 2010. Mini-Tn7 vectors as genetic  
549 tools for single copy gene cloning in *Acinetobacter baumannii*. *J Microbiol Methods*  
550 82:296-300.
- 551 21. Hunger M, Schmucker R, Kishan V, Hillen W. 1990. Analysis and nucleotide sequence  
552 of an origin of DNA replication in *Acinetobacter calcoaceticus* and its use for *Escherichia*  
553 *coli* shuttle plasmids. *Gene* 87:45-51.
- 554 22. Geisinger E, Mortman NJ, Vargas-Cuebas G, Tai AK, Isberg RR. 2018. A global  
555 regulatory system links virulence and antibiotic resistance to envelope homeostasis in  
556 *Acinetobacter baumannii*. *PLoS Pathog* 14:e1007030.



- 557 23. Kroger C, MacKenzie KD, Alshabib EY, Kirzinger MWB, Suchan DM, Chao TC,  
558 Akulova V, Miranda-CasoLuengo AA, Monzon VA, Conway T, Sivasankaran SK,  
559 Hinton JCD, Hokamp K, Cameron ADS. 2018. The primary transcriptome, small RNAs  
560 and regulation of antimicrobial resistance in *Acinetobacter baumannii* ATCC 17978.  
561 *Nucleic Acids Res* 46:9684-9698.
- 562 24. Bou G, Martinez-Beltran J. 2000. Cloning, nucleotide sequencing, and analysis of the  
563 gene encoding an AmpC beta-lactamase in *Acinetobacter baumannii*. *Antimicrob Agents*  
564 *Chemother* 44:428-32.
- 565 25. Prados J, Linder P, Redder P. 2016. TSS-EMOTE, a refined protocol for a more complete  
566 and less biased global mapping of transcription start sites in bacterial pathogens. *BMC*  
567 *Genomics* 17:849.
- 568 26. Gebhardt MJ, Gallagher LA, Jacobson RK, Usacheva EA, Peterson LR, Zurawski DV,  
569 Shuman HA. 2015. Joint Transcriptional Control of Virulence and Resistance to  
570 Antibiotic and Environmental Stress in *Acinetobacter baumannii*. *MBio* 6:e01660-15.
- 571 27. Gebhardt MJ, Shuman HA. 2017. GigA and GigB are Master Regulators of Antibiotic  
572 Resistance, Stress Responses, and Virulence in *Acinetobacter baumannii*. *J Bacteriol* 199.
- 573 28. Sharma A, Dubey V, Sharma R, Devnath K, Gupta VK, Akhter J, Bhando T, Verma A,  
574 Ambatipudi K, Sarkar M, Pathania R. 2018. The unusual glycine-rich C terminus of the  
575 *Acinetobacter baumannii* RNA chaperone Hfq plays an important role in bacterial  
576 physiology. *J Biol Chem* 293:13377-13388.
- 577 29. Kuo HY, Chao HH, Liao PC, Hsu L, Chang KC, Tung CH, Chen CH, Liou ML. 2017.  
578 Functional Characterization of *Acinetobacter baumannii* Lacking the RNA Chaperone  
579 Hfq. *Front Microbiol* 8:2068.
- 580 30. Zhou YN, Kusakawa N, Erickson JW, Gross CA, Yura T. 1988. Isolation and  
581 characterization of *Escherichia coli* mutants that lack the heat shock sigma factor sigma  
582 32. *J Bacteriol* 170:3640-9.
- 583 31. Tipton KA, Rather PN. 2017. An ompR-envZ Two-Component System Ortholog  
584 Regulates Phase Variation, Osmotic Tolerance, Motility, and Virulence in *Acinetobacter*  
585 *baumannii* Strain AB5075. *J Bacteriol* 199.
- 586 32. Casella LG, Weiss A, Perez-Rueda E, Ibarra JA, Shaw LN. 2017. Towards the complete  
587 proteinaceous regulome of *Acinetobacter baumannii*. *Microb Genom* 3:mgen000107.
- 588 33. Gallegos MT, Schleif R, Bairoch A, Hofmann K, Ramos JL. 1997. Arac/XylS family of  
589 transcriptional regulators. *Microbiol Mol Biol Rev* 61:393-410.
- 590 34. Martin RG, Rosner JL. 2001. The AraC transcriptional activators. *Curr Opin Microbiol*  
591 4:132-7.
- 592 35. Kelley LA, Mezulis S, Yates CM, Wass MN, Sternberg MJ. 2015. The Phyre2 web portal  
593 for protein modeling, prediction and analysis. *Nat Protoc* 10:845-58.
- 594 36. Zhao J, Yu X, Zhu M, Kang H, Ma J, Wu M, Gan J, Deng X, Liang H. 2016. Structural  
595 and Molecular Mechanism of CdpR Involved in Quorum-Sensing and Bacterial  
596 Virulence in *Pseudomonas aeruginosa*. *PLoS Biol* 14:e1002449.
- 597 37. Gallagher LA, Lee SA, Manoil C. 2017. Importance of Core Genome Functions for an  
598 Extreme Antibiotic Resistance Trait. *MBio* 8.
- 599 38. Kenyon JJ, Hall RM. 2013. Variation in the complex carbohydrate biosynthesis loci of  
600 *Acinetobacter baumannii* genomes. *PLoS One* 8:e62160.
- 601 39. Singh JK, Adams FG, Brown MH. 2018. Diversity and Function of Capsular  
602 Polysaccharide in *Acinetobacter baumannii*. *Front Microbiol* 9:3301.



- 603 40. Whitfield C. 2006. Biosynthesis and assembly of capsular polysaccharides in *Escherichia*  
604 *coli*. *Annu Rev Biochem* 75:39-68.
- 605 41. Jorgenson MA, Kannan S, Laubacher ME, Young KD. 2016. Dead-end intermediates in  
606 the enterobacterial common antigen pathway induce morphological defects in  
607 *Escherichia coli* by competing for undecaprenyl phosphate. *Mol Microbiol* 100:1-14.
- 608 42. Yother J. 2011. Capsules of *Streptococcus pneumoniae* and other bacteria: paradigms for  
609 polysaccharide biosynthesis and regulation. *Annu Rev Microbiol* 65:563-81.
- 610 43. Collins RF, Beis K, Dong C, Botting CH, McDonnell C, Ford RC, Clarke BR, Whitfield  
611 C, Naismith JH. 2007. The 3D structure of a periplasm-spanning platform required for  
612 assembly of group 1 capsular polysaccharides in *Escherichia coli*. *Proc Natl Acad Sci U*  
613 *S A* 104:2390-5.
- 614 44. Geisinger E, Isberg RR. 2015. Antibiotic modulation of capsular exopolysaccharide and  
615 virulence in *Acinetobacter baumannii*. *PLoS Pathog* 11:e1004691.
- 616 45. Peters JM, Colavin A, Shi H, Czarny TL, Larson MH, Wong S, Hawkins JS, Lu CHS,  
617 Koo BM, Marta E, Shiver AL, Whitehead EH, Weissman JS, Brown ED, Qi LS, Huang  
618 KC, Gross CA. 2016. A Comprehensive, CRISPR-based Functional Analysis of Essential  
619 Genes in Bacteria. *Cell* 165:1493-1506.
- 620 46. James DB, Yother J. 2012. Genetic and biochemical characterizations of enzymes  
621 involved in *Streptococcus pneumoniae* serotype 2 capsule synthesis demonstrate that  
622 Cps2T (WchF) catalyzes the committed step by addition of beta1-4 rhamnose, the second  
623 sugar residue in the repeat unit. *J Bacteriol* 194:6479-89.
- 624 47. Xayarath B, Yother J. 2007. Mutations blocking side chain assembly, polymerization, or  
625 transport of a Wzy-dependent *Streptococcus pneumoniae* capsule are lethal in the  
626 absence of suppressor mutations and can affect polymer transfer to the cell wall. *J*  
627 *Bacteriol* 189:3369-81.
- 628 48. Ranjit DK, Young KD. 2016. Colanic Acid Intermediates Prevent De Novo Shape  
629 Recovery of *Escherichia coli* Spheroplasts, Calling into Question Biological Roles  
630 Previously Attributed to Colanic Acid. *J Bacteriol* 198:1230-40.
- 631 49. Jorgenson MA, Young KD. 2016. Interrupting Biosynthesis of O Antigen or the  
632 Lipopolysaccharide Core Produces Morphological Defects in *Escherichia coli* by  
633 Sequestering Undecaprenyl Phosphate. *J Bacteriol* 198:3070-3079.
- 634 50. Richie DL, Takeoka KT, Bojkovic J, Metzger LEt, Rath CM, Sawyer WS, Wei JR, Dean  
635 CR. 2016. Toxic Accumulation of LPS Pathway Intermediates Underlies the  
636 Requirement of LpxH for Growth of *Acinetobacter baumannii* ATCC 19606. *PLoS One*  
637 11:e0160918.
- 638 51. Wei JR, Richie DL, Mostafavi M, Metzger LEt, Rath CM, Sawyer WS, Takeoka KT,  
639 Dean CR. 2017. LpxK Is Essential for Growth of *Acinetobacter baumannii* ATCC 19606:  
640 Relationship to Toxic Accumulation of Lipid A Pathway Intermediates. *mSphere* 2.
- 641 52. Zhang G, Baidin V, Pahil KS, Moison E, Tomasek D, Ramadoss NS, Chatterjee AK,  
642 McNamara CW, Young TS, Schultz PG, Meredith TC, Kahne D. 2018. Cell-based screen  
643 for discovering lipopolysaccharide biogenesis inhibitors. *Proc Natl Acad Sci U S A*  
644 115:6834-6839.
- 645 53. Darling AE, Mau B, Perna NT. 2010. progressiveMauve: multiple genome alignment  
646 with gene gain, loss and rearrangement. *PLoS One* 5:e11147.

- 647 54. Surujonu D, Bento J, van Opijnen T. 2020. Boundary-Forest Clustering: Large-Scale  
648 Consensus Clustering of Biological Sequences. bioRxiv  
649 doi:10.1101/2020.04.28.065870:2020.04.28.065870.
- 650 55. Hulsen T, de Vlieg J, Alkema W. 2008. BioVenn - a web application for the comparison  
651 and visualization of biological lists using area-proportional Venn diagrams. BMC  
652 Genomics 9:488.
- 653 56. Robinson JT, Thorvaldsdottir H, Winckler W, Guttman M, Lander ES, Getz G, Mesirov  
654 JP. 2011. Integrative genomics viewer. Nat Biotechnol 29:24-6.
- 655 57. Choi KH, Gaynor JB, White KG, Lopez C, Bosio CM, Karkhoff-Schweizer RR,  
656 Schweizer HP. 2005. A Tn7-based broad-range bacterial cloning and expression system.  
657 Nat Methods 2:443-8.
- 658 58. Carruthers MD, Nicholson PA, Tracy EN, Munson RS, Jr. 2013. *Acinetobacter*  
659 *baumannii* utilizes a type VI secretion system for bacterial competition. PLoS One  
660 8:e59388.
- 661 59. Jacobs AC, Thompson MG, Black CC, Kessler JL, Clark LP, McQueary CN, Gancz HY,  
662 Corey BW, Moon JK, Si Y, Owen MT, Hallock JD, Kwak YI, Summers A, Li CZ, Rasko  
663 DA, Penwell WF, Honnold CL, Wise MC, Waterman PE, Lesho EP, Stewart RL, Actis  
664 LA, Palys TJ, Craft DW, Zurawski DV. 2014. AB5075, a Highly Virulent Isolate of  
665 *Acinetobacter baumannii*, as a Model Strain for the Evaluation of Pathogenesis and  
666 Antimicrobial Treatments. MBio 5:e01076-14.
- 667 60. Guzzo M, Castro LK, Reisch CR, Guo MS, Laub MT. 2020. A CRISPR Interference  
668 System for Efficient and Rapid Gene Knockdown in *Caulobacter crescentus*. mBio 11.
- 669 61. Hitchcock PJ, Brown TM. 1983. Morphological heterogeneity among *Salmonella*  
670 lipopolysaccharide chemotypes in silver-stained polyacrylamide gels. J Bacteriol  
671 154:269-77.
- 672 62. Marchler-Bauer A, Bo Y, Han L, He J, Lanczycki CJ, Lu S, Chitsaz F, Derbyshire MK,  
673 Geer RC, Gonzales NR, Gwadz M, Hurwitz DI, Lu F, Marchler GH, Song JS, Thanki N,  
674 Wang Z, Yamashita RA, Zhang D, Zheng C, Geer LY, Bryant SH. 2017.  
675 CDD/SPARCLE: functional classification of proteins via subfamily domain  
676 architectures. Nucleic Acids Res 45:D200-D203.

677

678

## 679 **Figure Legends.**

680

681 **Fig. 1. Candidate essential genes in *A. baumannii* identified by Tn-seq with 2 transposon**  
682 **systems.** Venn diagram shows candidate essential genes identified in ATCC 17978 by *mariner*  
683 transposition (471 genes called essential or uncertain, blue circle) or by the Tn10-ATS system

684 (474 genes called essential, gray circle). The intersection of the genes sets had 372 genes,  
685 representing the candidate essential gene set using both systems.

686

687 **Fig. 2. CRISPRi system for efficient knockdown of gene expression in *A. baumannii*.** (A)

688 The *A. baumannii* CRISPRi system comprises a chromosomal *dcas9* gene with aTc-inducible  
689 expression driven by the *tet* promoter at the *attTn7* locus, and a high-copy plasmid-based sgRNA  
690 transcribed from constitutive J23119 promoter. *ori*<sub>pWH</sub> indicates pWH1266 origin of replication;  
691 *ori*<sub>pBR</sub> indicates pBR322 origin of replication. (B-D) Efficient CRISPRi-knockdown of the *adc*

692  $\beta$ -lactamase. (B) Diagram shows a region of the genome containing *adc*. Portions of  
693 ACX60\_RS05705 and *foIE* loci are shown. The position targeted by sgRNA<sub>*adc*</sub> is indicated by

694 black vertical arrow, and the predicted TSS of *adc* mRNA (23) is shown as blue arrowhead. (C)  
695 Cultures of the indicated strain were grown with or without aTc (100 ng/ml) and  $\beta$ -lactamase in

696 sonicates was measured. Bars show mean  $\pm$  SD (n = 2). (D) *adc* knockdown enhances

697 susceptibility to ampicillin. YDA004 (ATCC 17978 *tetP-dcas9*) with sgRNA<sub>*adc*</sub> or control

698 plasmid was cultured in microtiter format in the presence or absence of aTc (100 ng/ml) and/or  
699 ampicillin (AMP, 16  $\mu$ g/ml) and growth monitored by optical density measurements. Symbols

700 indicate geometric mean and area-filled dotted bands indicate SD (n = 3). Where not visible, SD  
701 is within the confines of the symbol. Control refers to pYDE007 (non-targeting control plasmid).

702

703 **Fig. 3. CRISPRi knockdown of *ftsZ* and *advA* blocks growth and cell division.** (A)

704 Transposon mutations in *ftsZ* and in most regions of *advA* were not detectable within Tn-seq  
705 pools. Normalized Tn-seq read counts were plotted according to position of their transposon

706 insertion in *mariner* and Tn10-ATS libraries. Locations of potential *mariner* insertion sites (TA

707 dinucleotides) within these regions are plotted as black points. Predicted TSSs (23, 25) are  
708 shown as blue arrowheads. Position targeted by sgRNAs are indicated by vertical black arrows.  
709 (B) YDA004 with sgRNA<sub>ftsZ</sub> was cultured with or without 200 ng/ml aTc, and growth was  
710 monitored by A<sub>600</sub> measurements. Data points show geometric mean  $\pm$  SD (n = 3). At 3 hours,  
711 samples were collected (arrowheads) and cells were imaged by phase-contrast microscopy (C).  
712 (D, E) AdvA is essential for growth in LB. (D) YDA004 with sgRNA<sub>advA</sub> was cultured for 3  
713 hours in LB with or without 200 ng/ml aTc, then back-diluted to A<sub>600</sub> = 0.01 into the same  
714 (fresh) medium and cultured for an additional 3 hours. Growth was monitored by A<sub>600</sub>  
715 measurements. Data points show geometric mean  $\pm$  SD (n = 3). Samples were taken at the time  
716 points indicated by arrowheads in and cells were imaged with phase contrast (F). Scale bars = 5  
717  $\mu$ m.

718

719 **Fig. 4. ACX60\_RS03245 (*RS03245*) is an essential predicted transcription factor. (A)**

720 Transposon mutations within *RS03245* were not detectable in Tn-seq pools. Normalized read  
721 counts associated with mutants containing transposons in the region of the *RS03245* locus were  
722 plotted according to position of their transposon insertion. Locations of potential *mariner*  
723 insertion sites (TA sites), predicted TSSs (23, 25), and sgRNA-targeted positions are indicated as  
724 in Fig. 3. (B) Efficient CRISPRi knockdown of *RS03245*. YDA004 with sgRNA targeting  
725 *RS03245* (sgRNA-15) or control plasmid was cultured for 2 hours with aTc (50 ng/ml) or no  
726 inducer. RNA was extracted and reverse-transcribed, and *RS03245* transcript levels were  
727 measured via qRT-PCR. Bars show geometric mean  $\pm$  SD (n = 3). (C-E) CRISPRi knockdown of  
728 *RS03245* blocks growth. YDA004 with indicated sgRNA or control plasmid was grown on solid  
729 LB agar  $\pm$  aTc 200 ng/ml (C) or the indicated liquid medium  $\pm$  aTc 100 ng/ml in microtiter

730 format (D, E). Data points show geometric mean  $A_{600} \pm SD$  ( $n \geq 2$ ). (F-H) Bacteria containing  
731 IPTG-regulated *RS03245* depend on IPTG for growth. JBA58 (*T5lacp-RS03245*) was grown on  
732 LB agar medium  $\pm$  IPTG (1 mM) (F) or in microtiter wells with the indicated liquid medium  
733 containing IPTG at the indicated concentration (G, H). Data points show geometric mean  $A_{600} \pm$   
734 SD ( $n \geq 3$ ). (I, J) *RS03245* is essential in two additional *A. baumannii* strain backgrounds, ATCC  
735 19606 and AB5075. ATCC 19606 *tetP-dcas9* (I) or AB5075 $\Delta$ RI *tetP-dcas9* (J) harboring pJE15  
736 or control plasmid was streaked on solid LB agar without or with aTc (200 ng/ $\mu$ l) and imaged  
737 after overnight incubation.

738

739 **Fig. 5. Conditional essentiality of capsule biosynthesis.** (A) Location and associated Tn-seq  
740 read abundance of transposon mutations within the K locus. Normalized read counts, predicted  
741 TSSs (23, 25), and sites targeted by sgRNAs are shown as in Fig. 3. Locations of potential  
742 *mariner* insertion sites (TA sites) are plotted as black points below the normalized read counts  
743 and appear merged due to the wide view (approximately 25 kb). (B) CRISPRi knockdown of  
744 *wza-wzb-wzc* transcriptional unit with the indicated sgRNA inhibits production of capsule.  
745 Capsular polysaccharide was analyzed in cell lysates by SDS-PAGE with alcian blue staining.  
746 Cultures were grown without or with aTc (200 ng/ml). (C) CRISPRi knockdown of late-stage  
747 capsule export blocks growth in a WT strain background (top, circles), but growth inhibition is  
748 suppressed with *itrA* deletion (middle, squares) or *bfmS* mutation (bottom, triangles). Strains  
749 containing the indicated sgRNA were grown in microtiter format in LB  $\pm$  aTc 200 ng/ml. Data  
750 points show geometric mean  $A_{600} \pm SD$  ( $n \geq 2$ ).  $\Delta$ *itrA tetP-dcas9* strain was JBA9; *bfmS*<sup>1-467</sup> *tetP-*  
751 *dcas9* strain was JBA8. (D) CRISPRi knockdown with sgRNA-1 (targeting 5' end of *wza*)  
752 blocks *wza* transcription in  $\Delta$ *itrA* background. Strains were grown with the indicated inducer

753 concentration for 1 hr. RNA was extracted, reverse-transcribed and *wza* transcript levels probed  
754 via qPCR. Shown is the mean of the fold change in transcript levels vs control, untreated  $\pm$  s.d.  
755 ( $n = 3$ ).  $P < 0.04$  in unpaired t-tests comparing sgRNA-1 vs control with each treatment  
756 condition. (E)  $\Delta wza \Delta itrA$  double mutant was easily isolated (JBA48) and shows growth kinetics  
757 identical to that of its  $\Delta itrA$  parent (EGA295) and WT. Data points show geometric mean  $A_{600} \pm$   
758 SD ( $n = 3$ ).

759

## 760 Supplemental Figure Legends

761 **Fig. S1. Candidate *A. baumannii* essential genes correspond well with candidates identified**  
762 **in prior studies.** Venn diagram shows the relationship of candidate essential genes determined  
763 with ATCC 17978 in this study by both *mariner* and Tn10-ATS systems (red circle) with sets of  
764 candidate essential genes previously identified by Tn-seq in the same strain (18) (green circle)  
765 and in strain AB5075-UW (19) (blue circle). Class of transposon utilized in each Tn-seq analysis  
766 is indicated.

767

768 **Fig. S2. Induction of *dcas9* with control non-targeting sgRNA does not alter growth or**  
769 **morphology.** (A) YDA007 (*tetP-dcas9*, control sgRNA) was cultured with or without 200 ng/ml  
770 aTc, and growth was monitored by  $A_{600}$  measurements. Data points show geometric mean  $\pm$  SD  
771 ( $n = 3$ ). No significant difference was detected at any time point ( $p > 0.05$ , t tests). (B) YDA007  
772 cells grown as in A were imaged by phase-contrast microscopy. Scale bar, 5 $\mu$ m.

773

774 **Fig. S3. Newly identified essential protein RS03245 shows structural homology with a *P.***  
775 ***aeruginosa* transcription factor and essentiality in two *A. baumannii* strain backgrounds.**

776 (A) Conserved domains in RS03245 protein (WP\_000085721) identified via CDD (62).  
777 Numbers above the protein indicate aa residue; numbers below each domain indicate E-value of  
778 CDD hit. (B) Sequence alignment between RS03245 protein sequence and known structure of *P.*  
779 *aeruginosa* CdpR (36) via Phyre2 (35). Predicted and known secondary structures are shown.  
780 Residues are color-coded based on property as described (35), and identical residues have gray  
781 background shading. Confidence of Phyre2 structural homology prediction was 100%, coverage  
782 was 90%. (C) 3D Phyre2 model predicting RS03245 protein folding based on structural  
783 homology with CdpR. NTR, CR, and HTH domains are indicated based on CdpR (36). (D) *A.*  
784 *baumannii* is highly sensitive to CRISPRi knockdown of *RS03245*. ATCC 17978 *tetP-dcas9*  
785 harboring pJE15 (sgRNA<sub>RS03245</sub> 15) or control plasmid were cultured in absence of inducer,  
786 serially diluted in PBS, and spotted onto solid LB agar containing the indicated aTc inducer  
787 concentration. Colonies were imaged after overnight growth. With sgRNA<sub>RS03245</sub> at high cell  
788 dilution, pinpoint colonies (arrowhead indicates example) were visible with 1.56 ng/μl, but no  
789 colonies were detected at higher inducer concentrations. (E) Rescue of IPTG dependence of  
790 T5lacP-*RS03245* by cloned *RS03245* expressed from constitutive promoter. ATCC 17978  
791 T5lacP-*RS03245* harboring the indicated plasmids were streaked on solid LB agar containing 0  
792 or 1mM IPTG, and imaged after overnight incubation.

793

794 **Table S1.** *A. baumannii* gene essentiality determined by Tn-seq.

795 **Table S2.** sgRNA targeting sequences used in this study.

796 **Table S3.** Candidate essential transcriptional regulators in *A. baumannii* ATCC 17978

797 **Table S4.** Essentiality analysis of predicted AraC-family transcription factors encoded in *A.*

798 *baumannii* ATCC 17978 genome.

799 **Table S5.** Bacterial strains and plasmids used in this study.

800 **Table S6.** Oligonucleotide primers used in this study.



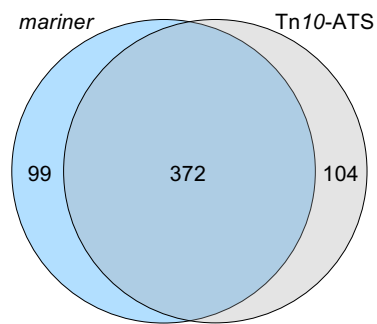

Fig. 1

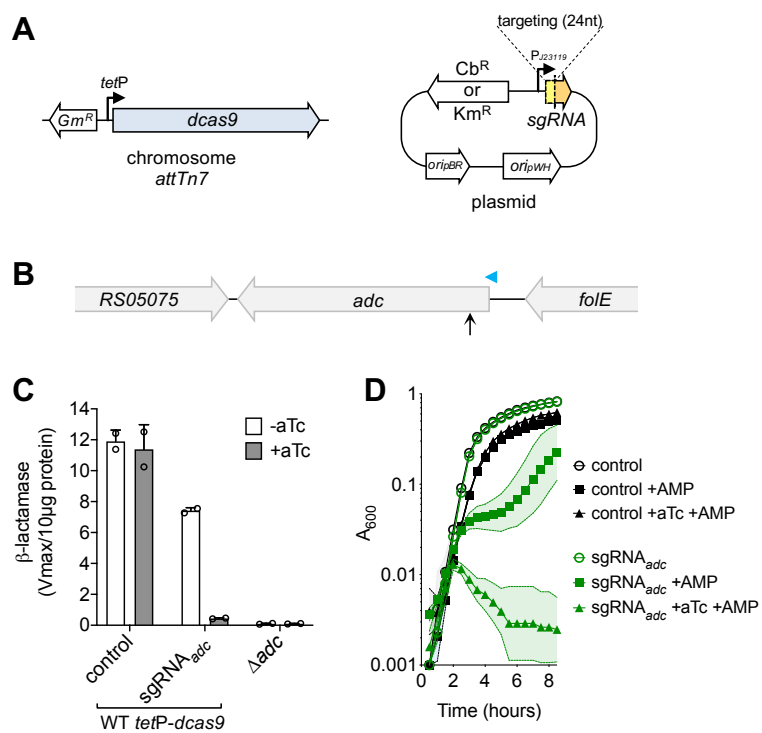

Fig. 2

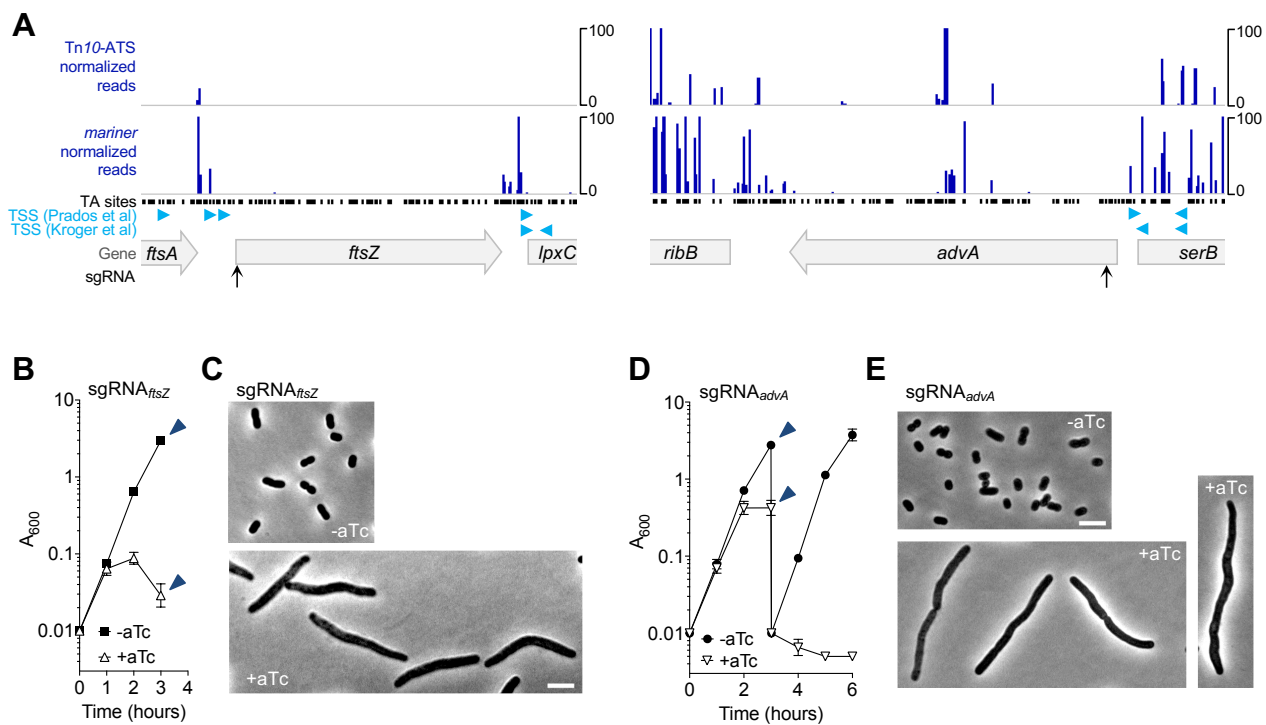

Fig. 3

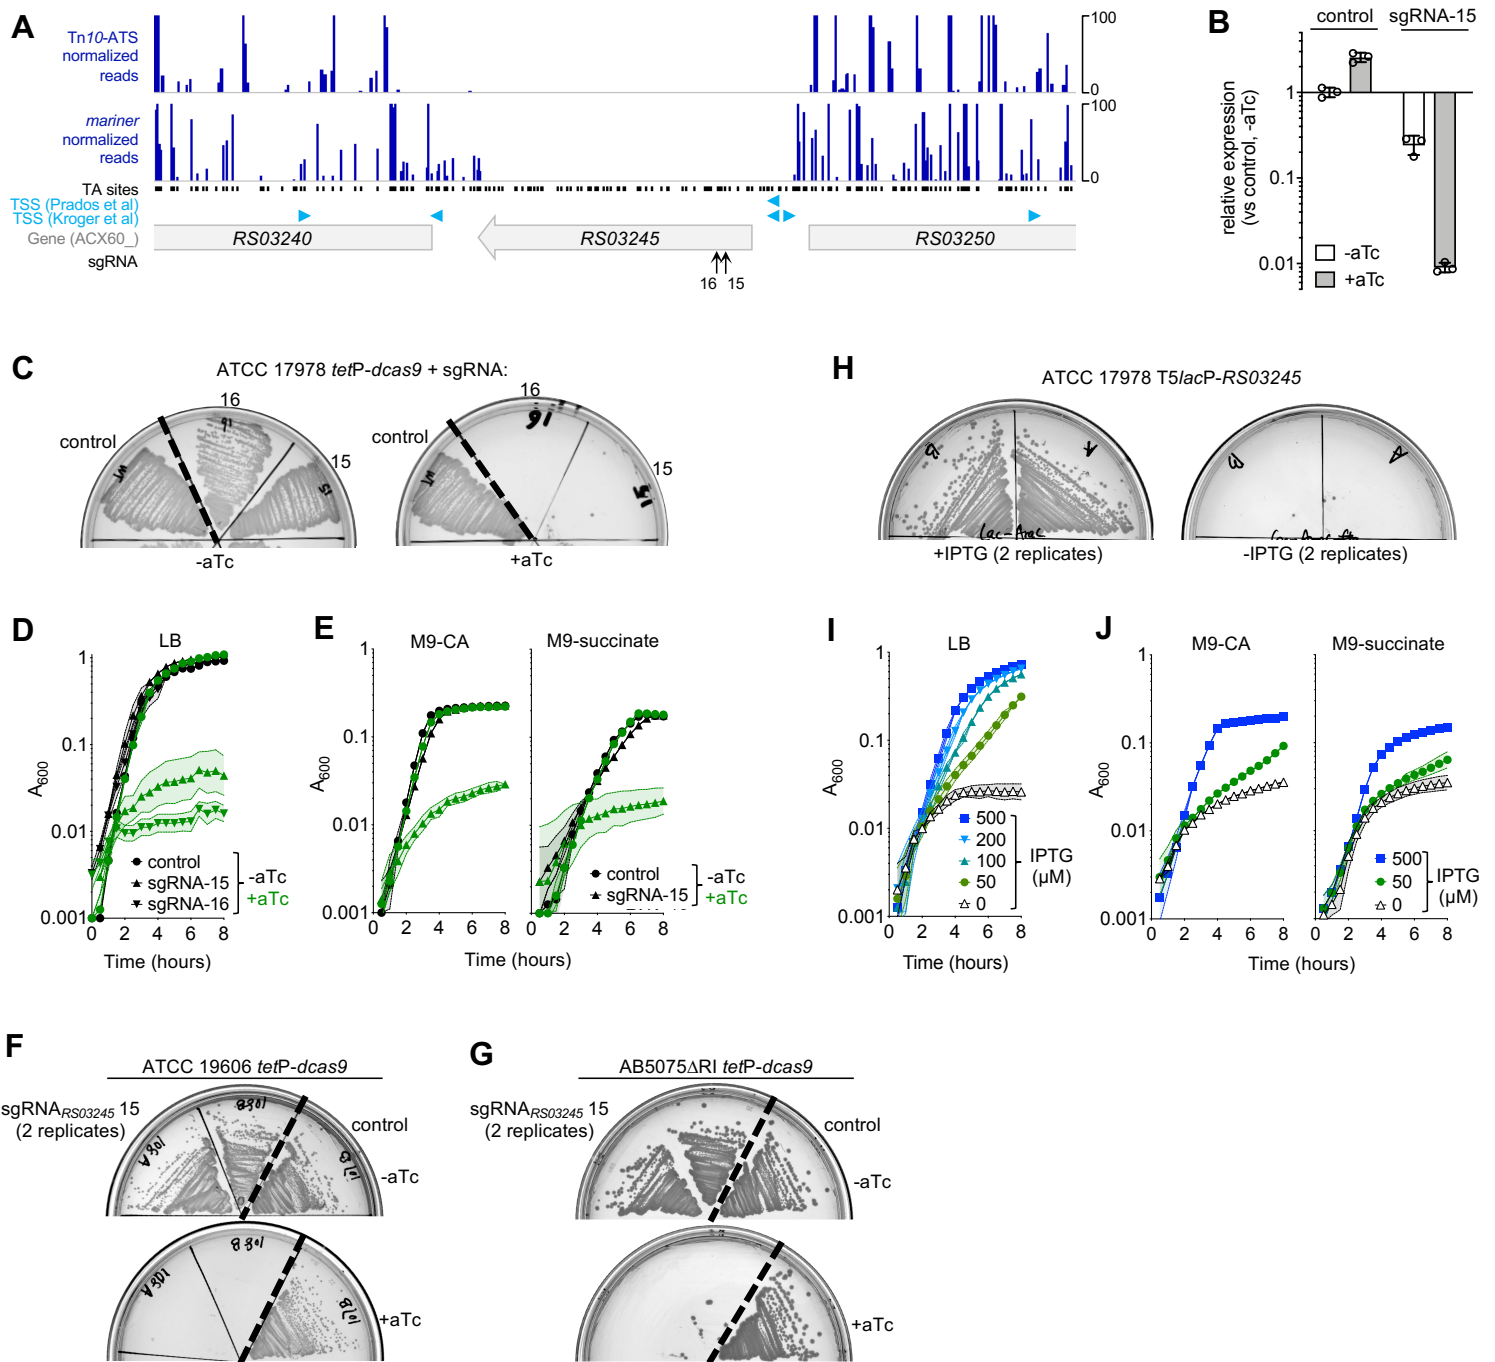

Fig. 4

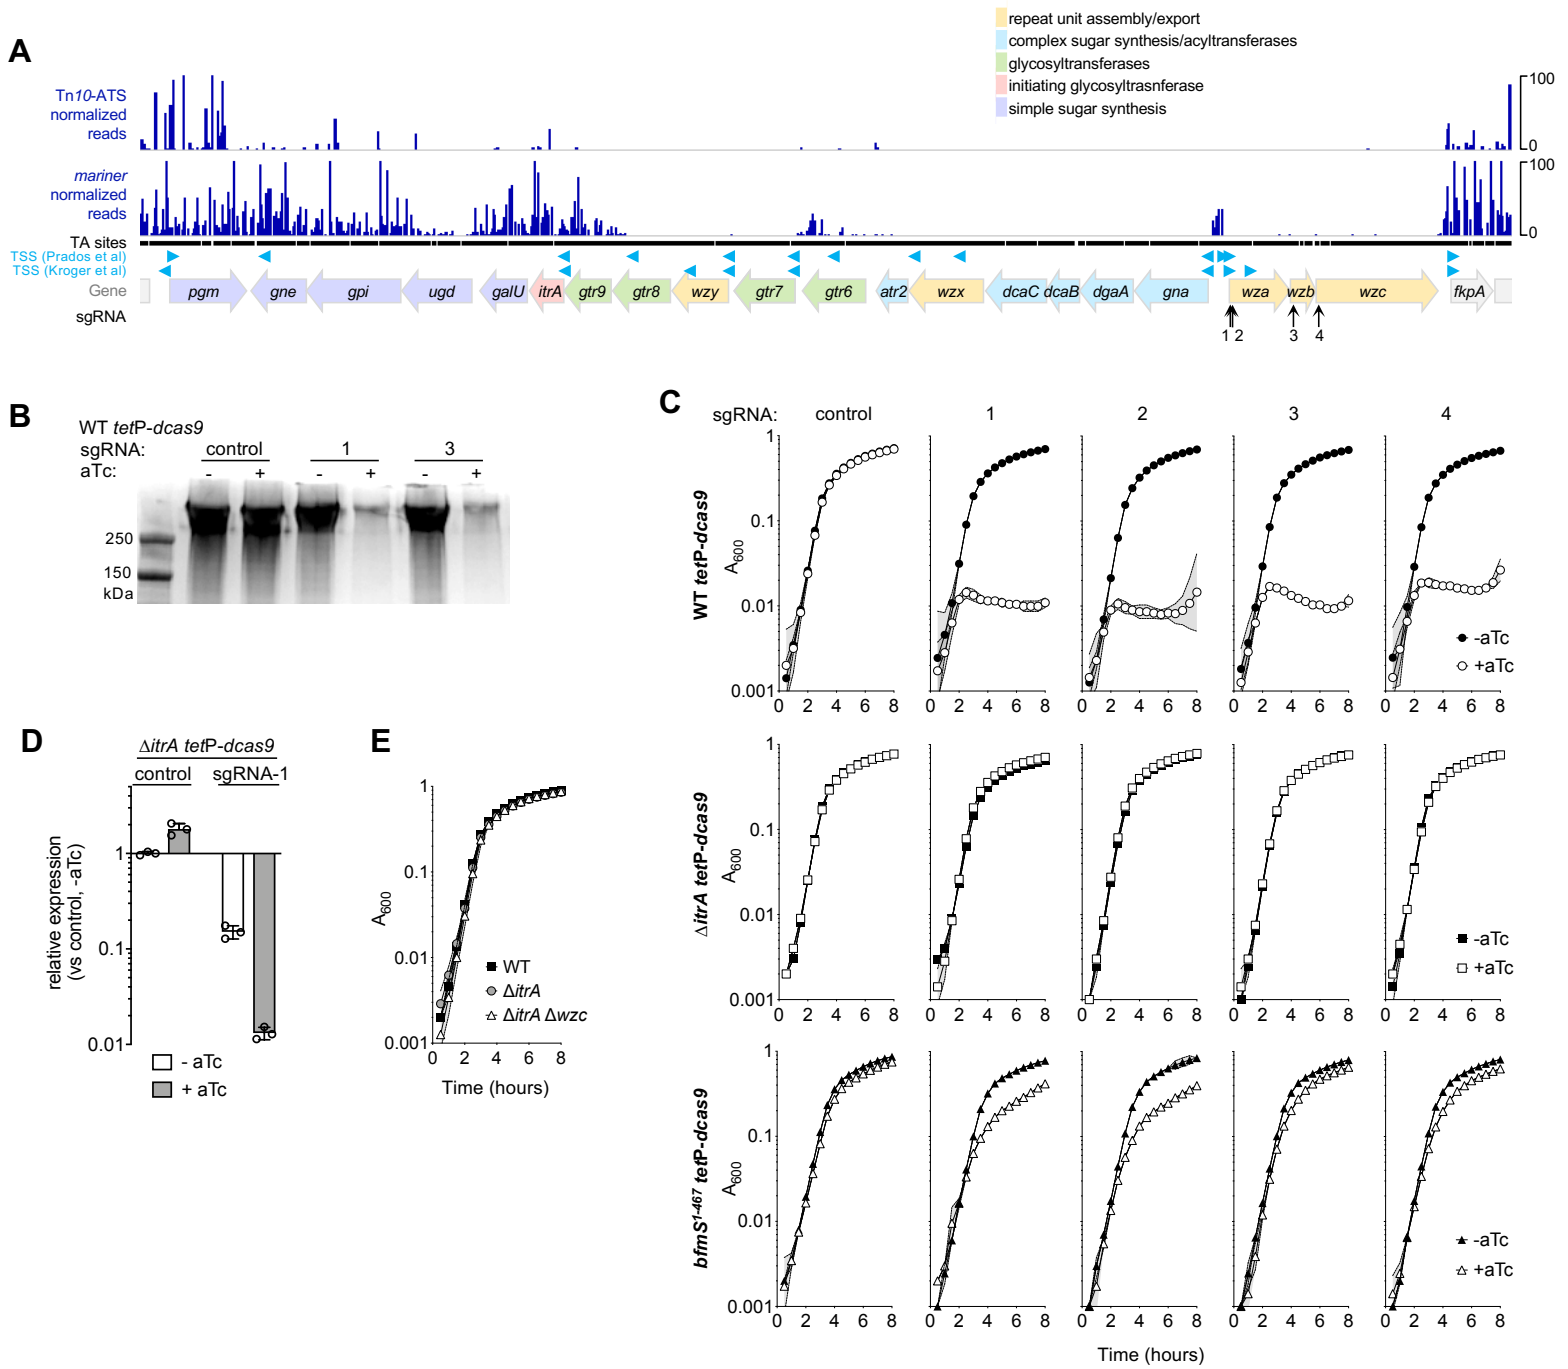

Fig. 5

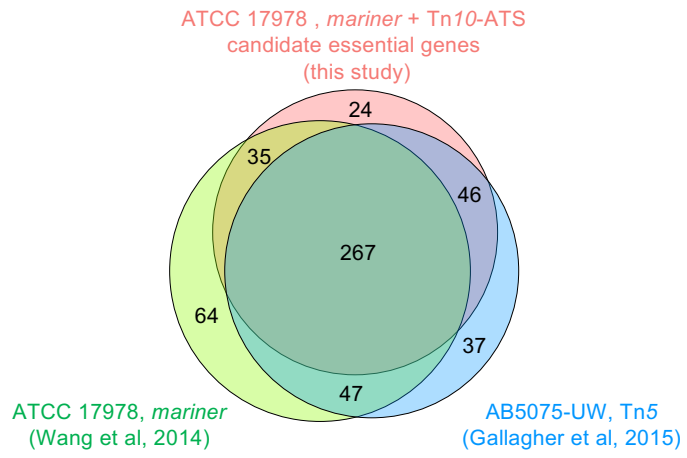

Fig. S1

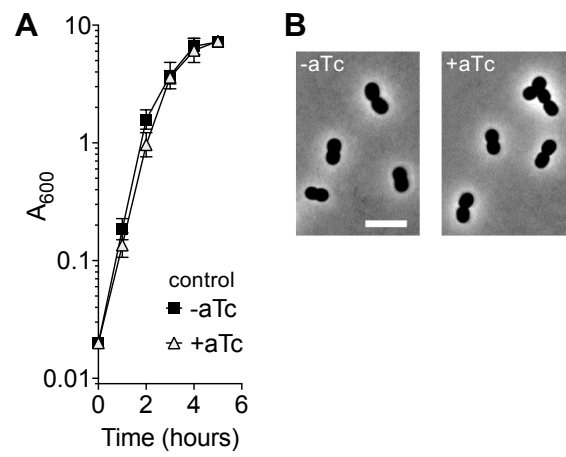

Fig. S2

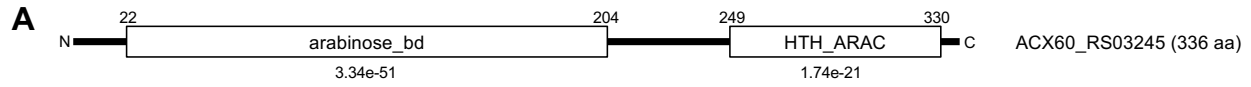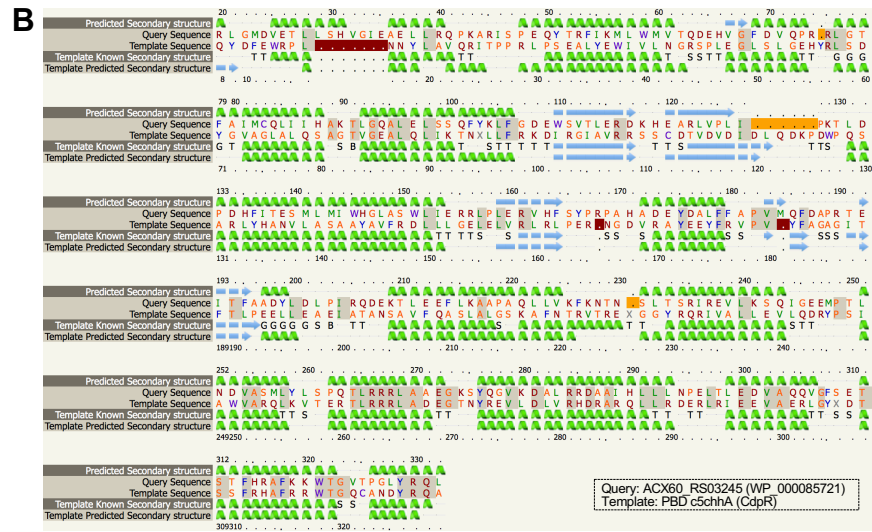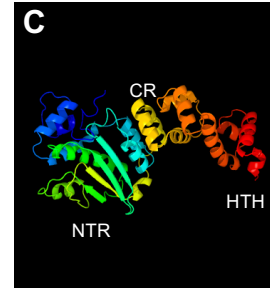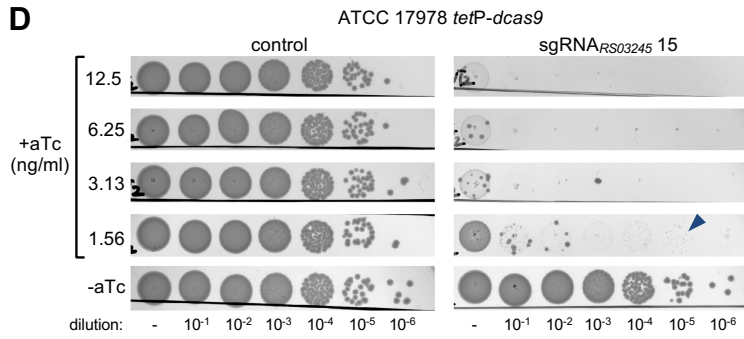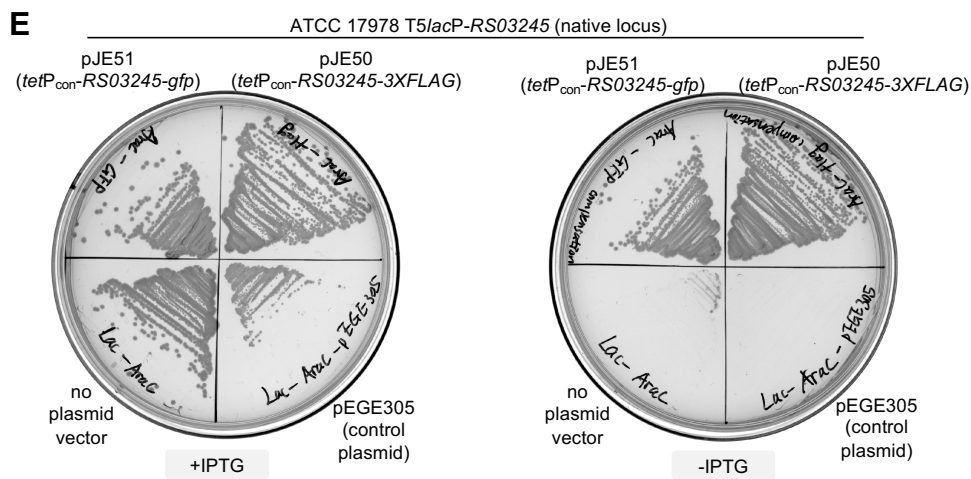

Fig. S3
